# Supplementary material for: Multisensory Information Facilitates Reaction Speed by Enlarging Activity Difference between Superior Colliculus Hemispheres in Rats
Source: PubMed Central journal article supplement (PMC3180293; doi:10.1371/journal.pone.0025283), 2011-09-26

# Supplementary Figure 2

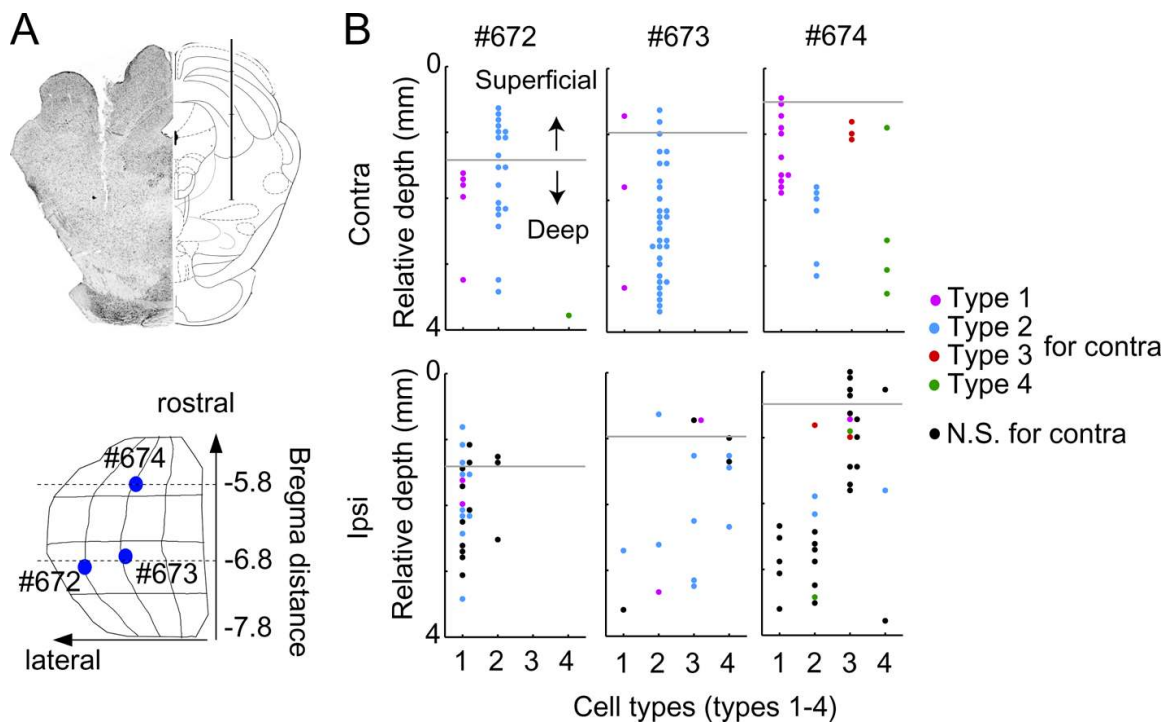

Supplement: pone.0025283.s002.pdf [file pone.0025283.s002.pdf]
